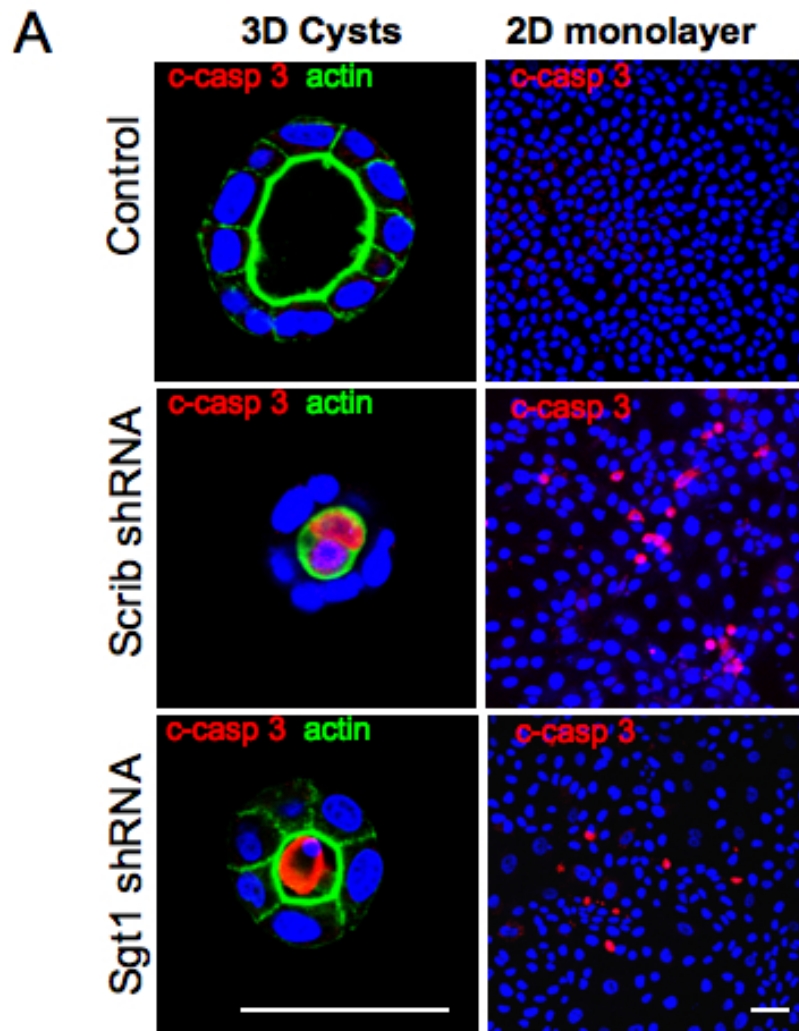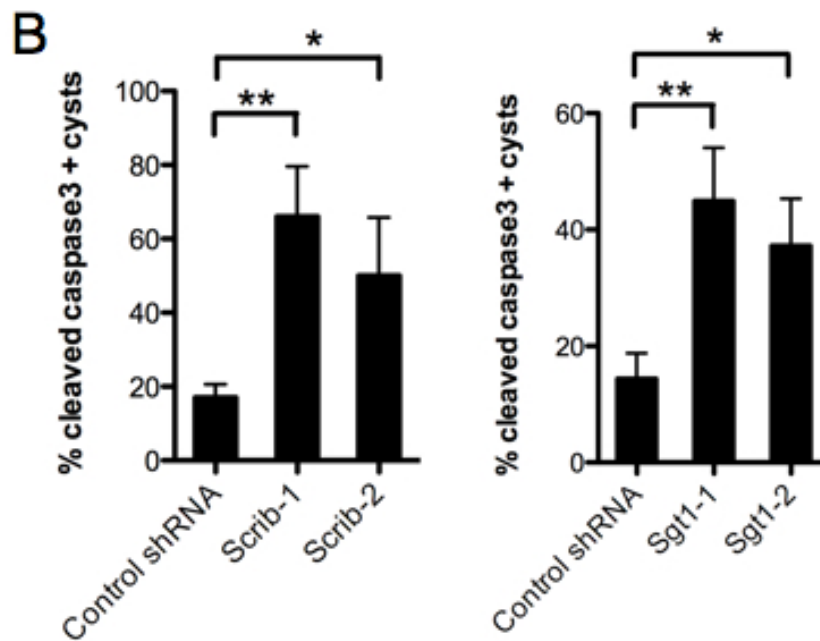

**Fig. S1.** Loss of Scrib or Sgt1 increases apoptosis in cysts. (A) Fixed MDCK cysts were stained with actin and cleaved caspase 3 (c-casp 3) as indicated. Nuclei are marked by Hoechst staining and pictured in blue. Localization of Scrib and Sgt1 RNAi cysts have increased cleaved caspase 3 (a marker of apoptosis) positive cells in their luminal space relative to controls. Increased numbers of cleaved caspase 3 positive cells could also be seen for Scrib and Sgt1 shRNA cells grown in 2D culture. (B) Quantification of cleaved caspase 3 staining in 4-5-day-old cysts derived from cells treated with experimental or control shRNAs. Statistically significant: (\*)= $P < 0.05$ , (\*\*)= $P < 0.01$ . Dunnett's multiple comparison test was used.

A

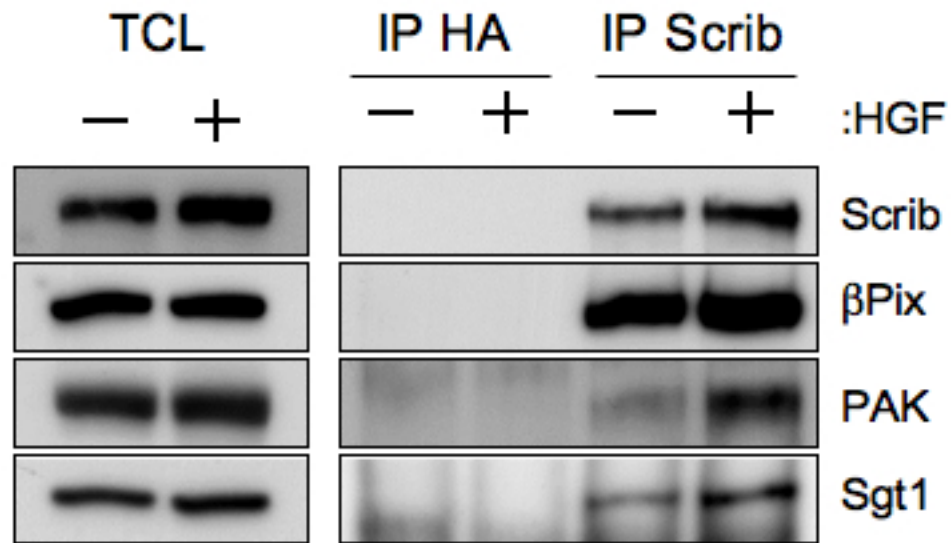

**Fig. S2.** Scrib forms a complex with  $\beta$ Pix and PAK. (A) MDCK cells were treated with or without HGF and total cell lysates (TCL) were prepared and subject to immunoprecipitation using a Scrib (C-20) or control HA antibody. IPs were isolated and subject to SDS-PAGE and western blot analysis alongside TCLs for the indicated proteins. IP of Scrib demonstrated a specific interaction with  $\beta$ Pix, PAK and Sgt1.

A

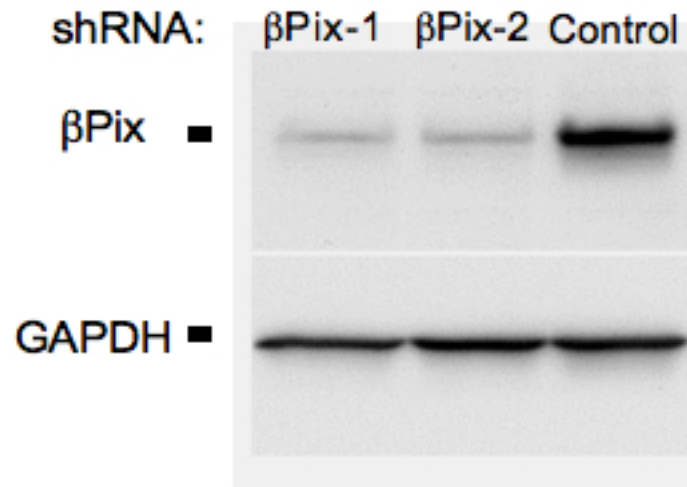

B

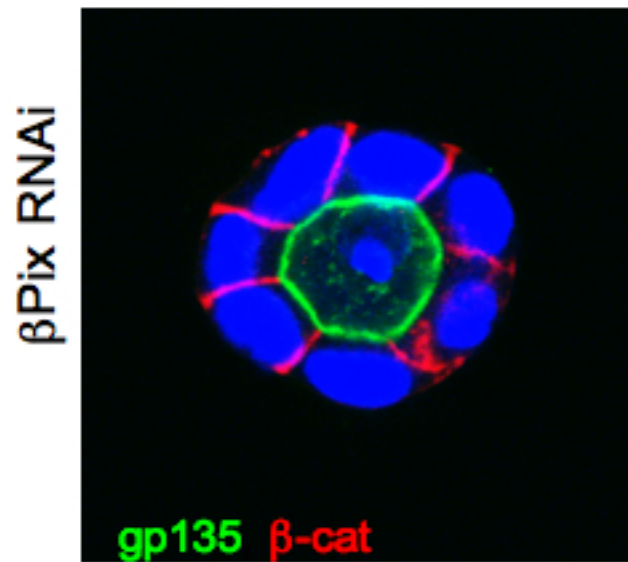

**Fig. S3.** RNAi of  $\beta$ Pix in MDCK cysts. (A) Western blot image of MDCK total cell lysates treated either with a control shRNA or shRNAs directed against  $\beta$ Pix. GAPDH is included as a loading control for the lysates. (B) Fixed MDCK cysts were stained with the apical domain marker gp135 and the adherens junction marker beta-catenin ( $\beta$ -cat). Nuclei are marked by Hoechst staining and pictured in blue.

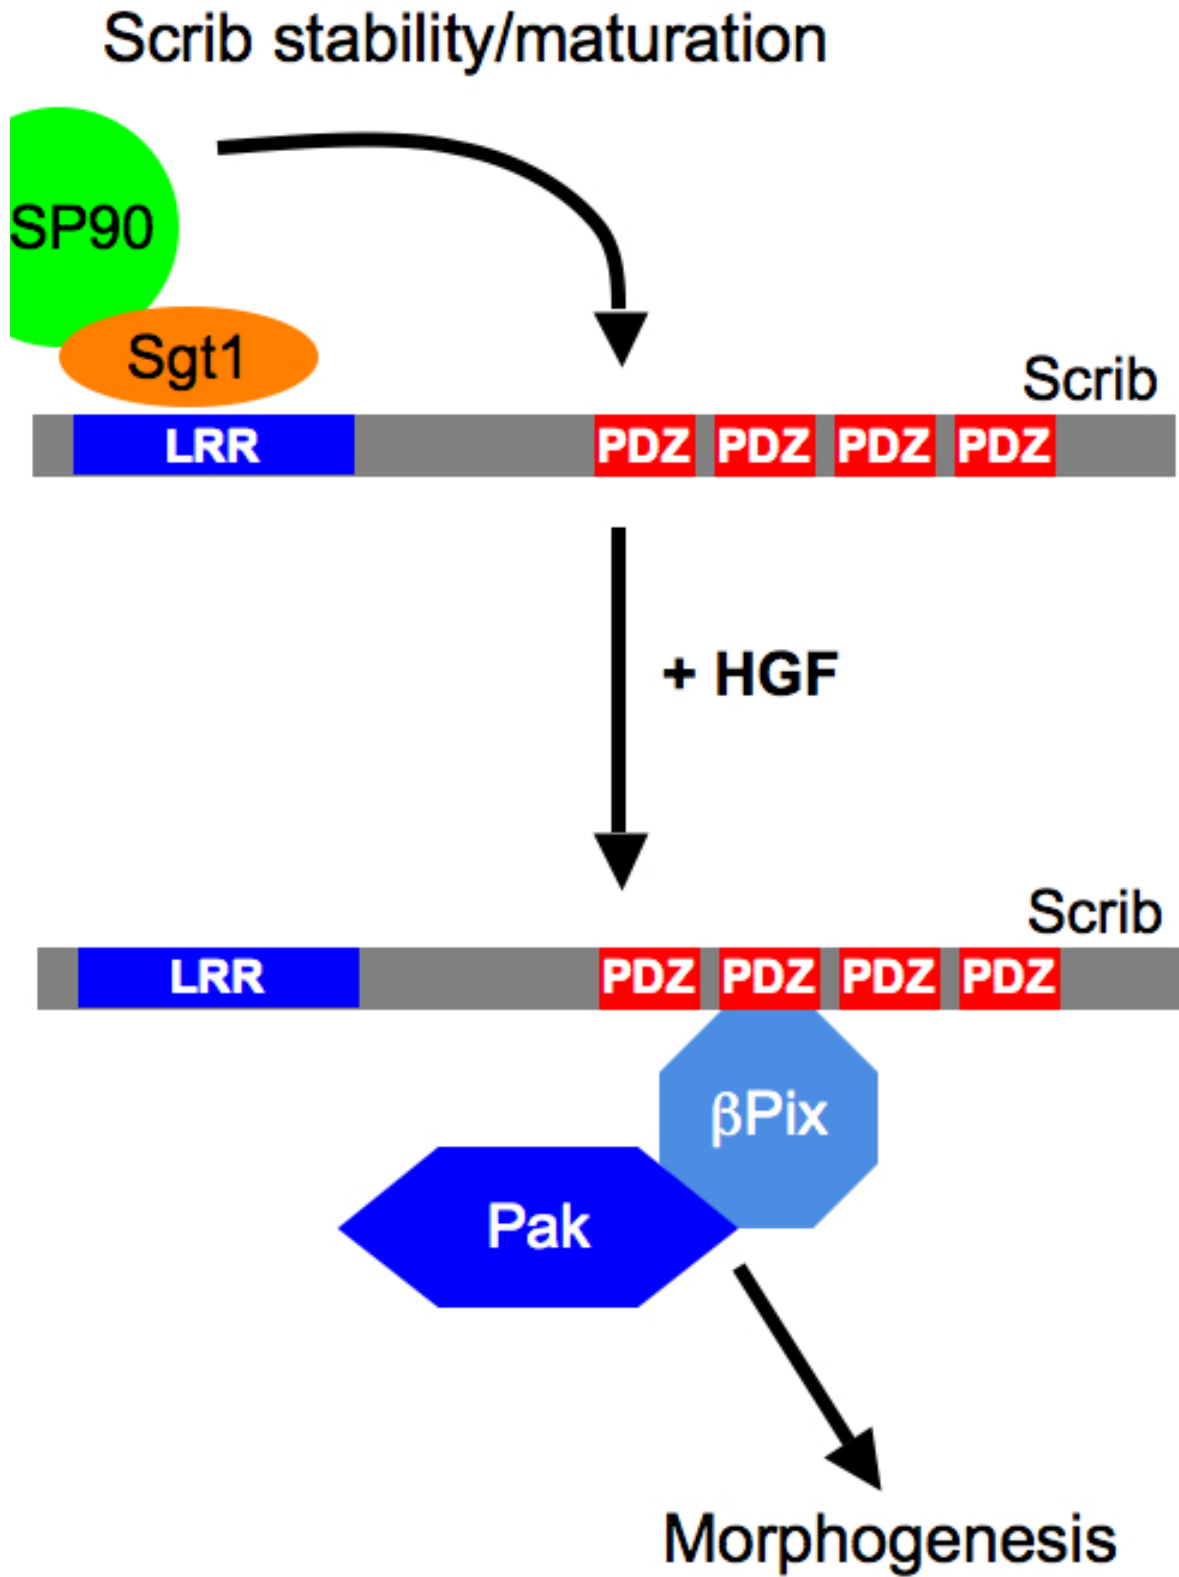

**Fig. S4.** Model. Model for Scrib complex regulation of epithelial morphogenesis. Sgt1-HSP90 functions to stabilize Scrib via the LRR domain. This enables Scrib to promote HGF-mediated extension formation through  $\beta$ Pix and PAK.
